# Supplementary material
Source: PubMed Central journal article supplement (PMC2596899)
Supplement: rspb20071421s10.pdf [file rspb20071421s10.pdf]

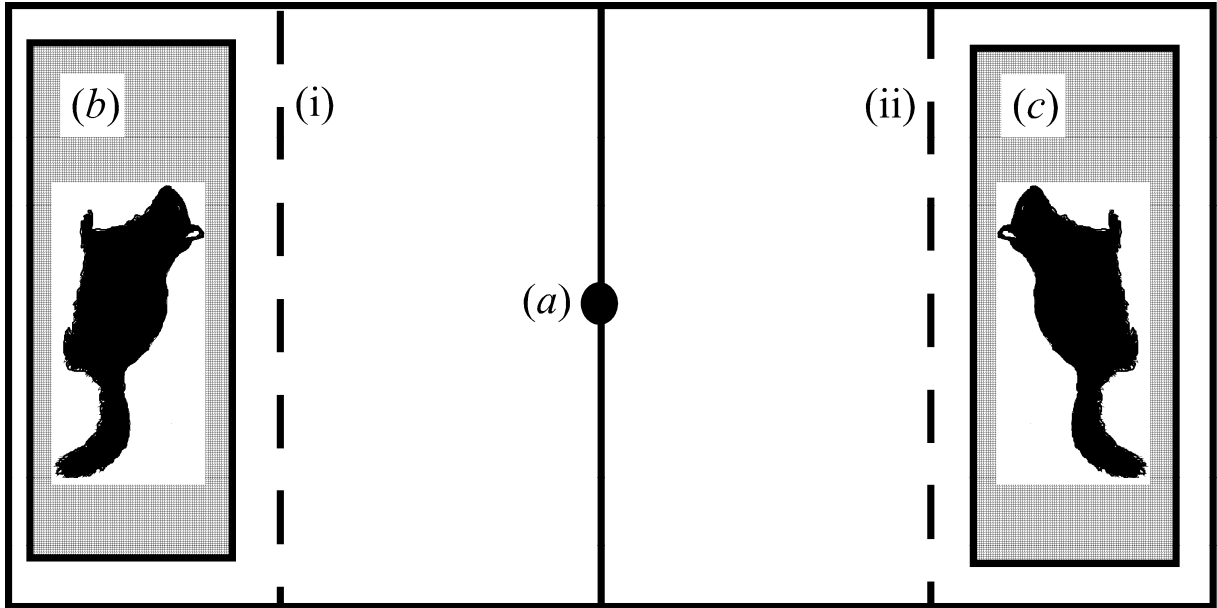

**Figure S1.** Flea host-choice testing chamber: Fleas were placed into the enclosed chamber (30 X 74 X 12 cm) at the (a) starting point and released from their vial. On opposite sides of the chamber (b and c) were a rattlesnake-scented and a water-scented anesthetized juvenile ground squirrel inside Tomahawk traps. Host choice was determined by what choice line (i or ii) they crossed, each 15 cm from the starting point.
