# Supplementary material
Source: PubMed Central journal article supplement (PMC2596899)
Supplement: rspb20071421s11.pdf [file rspb20071421s11.pdf]

## Supplementary Material

**Table S1.** California ground squirrel (Cal) and rock squirrel (Rock) behavior before (PRE) and after (POST) for scent applicators (applied rattlesnake scent) and controls (did not apply scent).

Values represent untransformed means  $\pm$  standard errors.

|             |      | <u>Controls</u> |        |               |        | <u>Scent Applicators</u> |        |               |        |
|-------------|------|-----------------|--------|---------------|--------|--------------------------|--------|---------------|--------|
|             |      | PRE $\pm$ SE    |        | POST $\pm$ SE |        | PRE $\pm$ SE             |        | POST $\pm$ SE |        |
| Resting     | Rock | 0.2083          | 0.0438 | 0.1277        | 0.0501 | 0.1480                   | 0.0501 | 0.1173        | 0.0401 |
|             | Cal  | 0.1765          | 0.0390 | 0.1474        | 0.0706 | 0.1824                   | 0.0465 | 0.0726        | 0.0209 |
| Moving      | Rock | 0.1513          | 0.0225 | 0.1722        | 0.0236 | 0.1230                   | 0.0255 | 0.1365        | 0.0178 |
|             | Cal  | 0.1875          | 0.0298 | 0.2500        | 0.0456 | 0.1838                   | 0.0225 | 0.1535        | 0.0280 |
| Grooming    | Rock | 0.0097          | 0.0057 | 0.0080        | 0.0040 | 0.0050                   | 0.0410 | 0.0076        | 0.0043 |
|             | Cal  | 0.0828          | 0.0232 | 0.1109        | 0.0370 | 0.0681                   | 0.0205 | 0.1154        | 0.0153 |
| Foraging    | Rock | 0.2880          | 0.0397 | 0.2680        | 0.0599 | 0.3730                   | 0.0838 | 0.5134        | 0.0900 |
|             | Cal  | 0.2562          | 0.0522 | 0.2473        | 0.0460 | 0.3011                   | 0.0635 | 0.3469        | 0.0652 |
| Vigilant    | Rock | 0.0305          | 0.0106 | 0.0416        | 0.0173 | 0.0423                   | 0.0190 | 0.0307        | 0.0139 |
|             | Cal  | 0.0765          | 0.0270 | 0.0420        | 0.0187 | 0.0468                   | 0.0167 | 0.0050        | 0.0037 |
| Out of view | Rock | 0.2986          | 0.0491 | 0.3583        | 0.0696 | 0.2961                   | 0.0733 | 0.1826        | 0.0769 |
|             | Cal  | 0.2750          | 0.0565 | 0.2214        | 0.0463 | 0.2584                   | 0.0457 | 0.2765        | 0.0730 |
| Tail-flag   | Rock | 0.0166          | 0.0114 | 0.0055        | 0.0055 | 0.0000                   | 0.0000 | 0.0000        | 0.0000 |
|             | Cal  | 0.0187          | 0.0135 | 0.0048        | 0.0033 | 0.0760                   | 0.0351 | 0.5333        | 0.3291 |
| Aggressive  | Rock | 0.0544          | 0.0207 | 0.0958        | 0.0304 | 0.0788                   | 0.0296 | 0.1000        | 0.0353 |
|             | Cal  | 0.0562          | 0.0245 | 0.0504        | 0.0190 | 0.0690                   | 0.0229 | 0.0452        | 0.0186 |
| Tolerant    | Rock | 0.0111          | 0.0060 | 0.0111        | 0.0080 | 0.0230                   | 0.0134 | 0.0076        | 0.0076 |
|             | Cal  | 0.1031          | 0.0535 | 0.0064        | 0.0016 | 0.0785                   | 0.0264 | 0.0309        | 0.0118 |
